1 **Profiles of bacteria isolates and their antimicrobial resistance**  
2 **pattern among housemaids working in communal living residences**  
3 **in Jimma City, Ethiopia**

4

5

6 Tadele Shiwito Ango<sup>1\*</sup>, Tizita Teshome<sup>2¶</sup>, Tesfalem Getahun<sup>2¶</sup>; Girma Mamo<sup>1&</sup>; Negalgn  
7 Byadgie<sup>1&</sup>

8 <sup>1</sup>Department of Public Health, Mizan-Aman Health Sciences College, Mizan-Aman, Ethiopia

9 <sup>2</sup>Department of Environmental Health Sciences and Technology, Institute of Health, Jimma  
10 University, Jimma, Ethiopia

11

12 \*Corresponding author

13 E-mail: [shiwitot2350@gmail.com](mailto:shiwitot2350@gmail.com) (TSA)

14

15 ¶These authors contributed equally to this work

16 &These authors also contributed equally to this work

17

18

19

20

21

22

23

24

25

26

27

28

29

## 30 Abstract

31 **Background:** Bacterial pathogens continued to be the major causes of foodborne gastroenteritis  
32 in humans and remained public health important pathogens across the globe. As regards,  
33 housemaids operating inside a kitchen could be the source of infection and may transmit disease-  
34 inflicting pathogens through infected hands. Profiles of bacteria isolates and their antimicrobial  
35 resistance patterns among housemaids employed in dwellings in Ethiopia; particularly in the  
36 study area haven't been underexplored yet.

37 **Objective:** A study aimed to assess the profiles of bacteria isolates and antimicrobial resistance  
38 patterns among housemaids working in communal living residences in Jimma City, Ethiopia.

39 **Methods:** Laboratory-based cross-sectional study design was employed among 230 housemaids  
40 from April-June 2022. Hand swabs samples from the dominant hand of the study participants  
41 were collected under sterile conditions for the segregation of commensal microbes following  
42 standard operating procedures. Then in the laboratory, the swabs were inoculated aseptically  
43 using streak-plating methods on mannitol salt agar, MacConkey agar, Salmonella-shigella agar,  
44 and Eosin Methylene Blue Agar. Then inoculated samples were incubated at 37°C for 24 hours  
45 for bacterial isolation. In addition, a set of biochemical tests was applied to examine bacterial  
46 species. Data was entered into Epidata version 3.1. All statistics were performed using SPSS®  
47 statistics version 26. Descriptive analyses were summarized using frequency and percentage.

48 **Results:** The response rate of respondents was 97.8%. The prevalence of bacterial contaminants  
49 in the hands of housemaids who tested positive was 72% (95%CI: 66.2-77.8%). The isolated  
50 bacterial were *Staphylococcus aureus* (31.8%), *Coagulase-Negative Staphylococci* (0.9%),  
51 *Escherichia coli* (21.5%), *Salmonella* (1.3%), *Shigella* (6.7%), *Klebsiella species* (23.3%) and  
52 *Proteus species* (14.8%). The isolation rate of bacteria was significantly associated with the  
53 removal watch, ring, and bracelet during hand washing. Most isolated bacteria were sensitive to  
54 Chloramphenicol while the majority of them were resistant to Tetracycline, Gentamycin,  
55 Vancomycin, and Ceftazidime.

56 **Conclusions:** Hands of housemaids are important potential sources of disease-causing bacterial  
57 pathogens that would result in the potential risk of foodborne diseases. Most isolated bacteria  
58 were resistant to tested antimicrobial drugs. Everybody responsible should work practice of good  
59 hand hygiene.

60 **Keywords:** Bacteria isolate, Antimicrobial resistance, Housemaids, Ethiopia

## 61 **1. Introduction**

62 Enteric bacterial pathogens are the major causes of foodborne gastroenteritis in humans and  
63 remain public health important pathogens worldwide [1]. These enteric bacterial pathogens are  
64 common food-borne disease agents and persisted as a major public health worry. A study  
65 revealed that food commodities were contaminated by food handlers or housemaids [2].  
66 Moreover, the majority of foodborne outbreak causative agents enter the body through the  
67 ingestion of contaminated food [3,4]. According to Banik and colleagues, foodborne illnesses  
68 occurred after those disease-causing microbes entered the food supply chain [5]. WHO report in  
69 2020, showed that there were about 600 million cases and 420,000 deaths related to  
70 contaminated food in the world [4]. However, the problem is severe in developing countries  
71 including Ethiopia. The summary report of the Ministry of Health revealed that the annual  
72 incidences of food-borne illnesses ranged from 3.4 to 9.3% in Ethiopia [6].

73 Fecal-oral route of pathogen transmission is the major among the other methods of infection  
74 transmission for heterogeneous pathogens particularly for *Staphylococcus aureus*, *Coagulase-*  
75 *Negative Staphylococci*, *Klebsiella species*, *Proteus species*, *E.coli*, *Shigella*, *Salmonella species*,  
76 *V.Cholerae*, *Streptococcus pneumonia*, and others bacterial isolates [5,7–14]. Furthermore,  
77 studies revealed that bacteria were the most extensively identified infectious agent for the  
78 majority of foodborne outbreak types [6,15].

79 Due to the high prevalence of drug resistance pathogens, advances in infection control haven't  
80 completely eradicated the problems [10]. In addition, the constant increase in AMR bacterial  
81 strains has become an important clinical problem [16,17]. They include the members of  
82 Enterobacteriaceae, and continued the increasing concern and lead to the narrowing of available  
83 therapeutic options [17,18]. Those AMRs are caused by different reasons. Thus, the microbial  
84 evolution and transmission of genetic determinants of resistance between microbes enable the  
85 spread of pathogenic bacteria [17–21]. In addition, the widespread and prolonged use of  
86 antibiotics leads to the emergence of resistant bacterial pathogens [10,21,22]. In sum, it is an  
87 emerging global challenge that results in the spread of infectious diseases that affect human  
88 populations [21,23]. Moreover, the problems of infectious diseases were worsened by the  
89 improper use of antibiotics by humans and animals which contribute to the rise of AMR globally  
90 [10,16–21,23–25].

91 Therefore, pathogenic microbes continued the challenge for healthcare systems in developing  
92 countries including Ethiopia [24]. Evidence from studies revealed an increasing incidence of  
93 multidrug resistance in food-borne pathogens particularly to the commonly used antimicrobial  
94 medications [24,25]. In the fact, most studies conducted were institution based such as the  
95 hospital, mass food processing, and catering establishments [9,10,15,22], still now in Ethiopia,  
96 there is no clear data or information that shows profiles of isolated bacteria and antimicrobial  
97 resistance among housemaids in dwellings, particularly in the study area. Therefore, the present  
98 study aimed to assess the profiles of bacteria isolates and their antimicrobial resistance pattern  
99 among housemaids working in communal living residences in Jimma City, Ethiopia.

100  
101  
102  
103  
104  
105  
106  
107  
108  
109  
110  
111  
112  
113  
114  
115  
116  
117  
118

## 119 **2. Materials and Methods**

### 120 **2.1. Study area, design, and period**

121 The present laboratory-based cross-sectional survey included 230 housemaids engaged in  
122 communal living residences in Jimma City, Jimma Zone, Oromia region, Southwest part of  
123 Ethiopia during the period from April-June, 2022. The Jimma city is located 352km southwest of  
124 Addis Ababa with geographical coordinates between 7°41' N latitude and 36°50' E longitudes,  
125 and it has an average altitude of 1780m above sea level. It receives a mean annual rainfall of  
126 about 1530 millimeters. The mean annual minimum and maximum temperatures of Jimma city  
127 are 14.4°C and 26.7°C respectively [26].

### 128 **2.2. Data collection techniques**

129 Data was collected by the data collectors after obtaining written informed consent using a pre-  
130 tested semi-structured questionnaire and observation designed to obtain socio-demographic data  
131 like sex, age and educational status, and other relevant data related to housemaids' hand hygiene  
132 practices such as fingernail status, frequent handwashing, how to wash hands, use of soap and  
133 water for frequent hand washing, follow five steps to wash hands in the right way, removal of  
134 watch, ring, and bracelets during handwashing and time in second to wash hands from the study  
135 participants following their written informed consent and ethical approval of the study approved  
136 from the Institutional Review Board of the Institute of Health, Jimma University.

### 137 **2.3. Laboratory data, analysis, and interpretation**

138 Data on the commensal microbes from the hand swabs were collected through laboratory  
139 investigation by following the standard operating procedures (SOPs).

#### 140 **2.3.1. Sample collection and transport**

141 Sterile cotton swabs and 10ml saline containing sterile test tubes were prepared to collect and  
142 transport the samples. Though for the bacterial isolates from hand swabs, after handwashing  
143 participant's dominant hand was sampled by rubbing all over the surface using sterile-moistened  
144 cotton-tipped swabs in the moistened state; and then placed/soaked in labeled 0.85% saline  
145 solution containing sterile test tubes for microbial culturing. However, notification was not  
146 delivered in advance and extra hand hygiene was not allowed during sample collection [22,27].  
147 Swabs samples were collected by three well-trained laboratory personnel in standard aseptic

148 procedures. Soon after collection, samples were sent to the Microbiology laboratory at the  
149 Department of Medical Microbiology at Jimma University. Then in the laboratory, the samples  
150 were enriched in nutrient broth for 24 hours to enhance the recovery of the isolates because the  
151 survival of bacteria collected can be affected by handwashing.

### 152 **2.3.2. Sample culture and identification**

153 The common method to identify bacteria is through the use of selective media which can hinder  
154 or suppresses the growth of unwanted commensal microbes or the use of differential media  
155 which is easier to distinguish colonies of desired micro-organisms from other colonies growing  
156 on the same plate [28,29].

157 The media used in this study were prepared according to the manufacturer's instructions. A loop  
158 full of each hand swabs sample enriched on nutrient broth was inoculated aseptically using  
159 streak-planting methods on the selective and differential (Mannitol salt agar; MacConkey agar;  
160 salmonella-shigella agar and Eosin Methylene Blue Agar) and then incubated at 37°C for 24  
161 hours. After an incubation period, the culture plates were examined for the growth of bacteria,  
162 and the morphology of the isolates was recorded.

### 163 **2.3.3. Biochemical tests**

164 The single colony of bacteria grown on selective and differential media was then subcultured  
165 into nutrient agar to determine growth patterns and for further biochemical tests. Then after  
166 obtaining pure colonies, identification of bacterial isolates was done by using standard  
167 microbiology techniques like the morphology of its colonies and a battery (set) of biochemical  
168 tests like a response on catalase, coagulase, oxidase, Simon citrate agar (SCA), urease, sulfide  
169 indole motility (SIM), Kligler Iron Agar (KIA), gas and hydrogen sulfide (H<sub>2</sub>S) generation [14].  
170 The isolation and identification of bacteria from hand swabs from the hands of housemaids are  
171 shown below (Fig 1).

172

173

174

175

176 **Figure 1: Laboratory flow chart showing bacterial isolations from hand swabs samples.**

### 177 **2.3.4. Antimicrobial susceptibility tests**

178 Antimicrobial susceptibility tests were performed on Muller Hinton Agar (HIMEDIA, TITAN  
179 BIOTECH LTD, Rajasthan, India) by disc diffusion method. The following antimicrobial drugs  
180 were used to test susceptibility: Tetracycline (30 $\mu$ g), Ceftriaxone (30 $\mu$ g), Chloramphenicol  
181 (30 $\mu$ g), Gentamicin (10 $\mu$ g), Vancomycin (30 $\mu$ g), and Ceftazidime (30 $\mu$ g). The selections of  
182 drugs were based on availability and pieces of literature [14,30]. The susceptibility profiles that  
183 mean sensitivity, intermediate and resistance of the bacterial isolates were interpreted according  
184 to the NCCLSs [30].

185 **Table 1: Zone diameter interpretive standards for the determination of antimicrobial agent**  
186 **sensitivity and resistance test by Disk Diffusion method.**

| Antimicrobial agent | Disk content ( $\mu$ g) | Interpretive categories and zone diameter breakpoints nearest whole mm |              |           |
|---------------------|-------------------------|------------------------------------------------------------------------|--------------|-----------|
|                     |                         | Sensitive                                                              | Intermediate | Resistant |
| Tetracycline        | 30                      | $\geq 15$                                                              | 12-14        | $\leq 11$ |
| Ceftriaxone         | 30                      | $\geq 23$                                                              | 20-22        | $\leq 19$ |
| Chloramphenicol     | 30                      | $\geq 18$                                                              | 13-17        | $\leq 12$ |
| Gentamicin          | 10                      | $\geq 15$                                                              | 13-14        | $\leq 12$ |
| Vancomycin          | 30                      | $\geq 12$                                                              | 10-11        | $\leq 9$  |
| Ceftazidime         | 30                      | $\geq 21$                                                              | 18-20        | $\leq 17$ |

187 Disk Diffusion method [30].

### 188 **2.4. Data quality management**

189 To control the quality of laboratory data, laboratory tests for the investigation of commensal  
190 microbes have strictly adhered to standard operating processing [29]. In addition, the proper  
191 functioning of the instruments utilized was checked before processing samples and the known  
192 strains of selected organisms (*S.aureus* ATCC12981 and *E.coli* ATCC25922) were used for  
193 comparison purposes amid distinguishing proof as far quality

### 194 **2.5. Data processing and analysis**

195 Data were edited, cleaned, and double-entered into Epidata version 3.1. All statistical  
196 calculations were performed using IBM® SPSS® Statistics version 26. Descriptive analyses were  
197 summarized using frequency and percentage to present in texts, tables, and figures.

## 198 **2.6. Ethical consideration**

199 The research was conducted after approval of ethical clearance by the IRB of Jimma University.  
200 Both oral and informed consent was sought from each respondent. The overall information  
201 obtained from study participants and their privacy was kept strictly confidential using codes. The  
202 unusual clinical finding would be linked to concerned bodies including the study participants and  
203 households. PPE was applied such as the use of a mask, the use of gloves, rubbing hands with  
204 sanitizer or alcohol, and hand washing with soap during data collection to prevent transmission  
205 of Covid-19 between the data collector to the study participants and vice-versa.

206

207

208

209

210

211

212

213

214

215

216

217

218

219

220

221

222

223

224

225



## 226 **3. Results**

### 227 **3.1. Socio-demographic characteristics**

228 Two hundred and twenty-five study subjects (housemaids) participated in this study. All the  
229 respondents were females. The age of study participants ranged from 18 to 36 with a mean age of  
230 21.41±SD of (3.961). The majority, 182(81%) and 34(15%) of the study participants were  
231 between the age category of 18-30 years and age 18-24years respectively (**Fig 2**).

232

233

234

235

236

237

238

239

240 **Figure 2: Pi chart showing the age category of housemaids (n=225) working in communal**  
241 **residences in Jimma City, Southwest Ethiopia, 2022.**

242

243

244

245 More than half, (53%) of study participants attended primary school while 7(3%) of respondents  
246 cannot read and write (**Fig 3**).

247

248

249

250

251

252

253

254 **Figure 3: Pi chart showing the educational status of housemaids (n=225) working in**  
255 **communal residences in Jimma City, Southwest Ethiopia, 2022.**

### 256 3.2. Bacterial isolates

257 The majority, 162(72%) of study participants tested positive for one or more than one bacterial  
258 hand contaminant. The total number of isolated bacteria from hand swab samples was 224.  
259 *Staphylococcus aureus* 71(31.6%) was the predominant bacterial species isolated from hand  
260 swabs of housemaids followed by *Klebsiella species* 52(23.1%) and *Escherichia coli* 48(21.3%)  
261 whereas the least isolated bacteria was *Coagulase-Negative Staphylococci* (0.90%). However,  
262 bacteria weren't isolated from the hand swabs of 63(28%) of the study participants (**Table 2**).

263 **Table 2: Types of bacteria isolated from hand swabs of housemaids (n=225) working in**  
264 **communal living residences in Jimma City, Southwest Ethiopia, 2022.**

| Bacteria                                | Frequency | Percent |
|-----------------------------------------|-----------|---------|
| <i>Staphylococcus aureus</i>            | 71        | 31.6    |
| <i>Coagulase-Negative Staphylococci</i> | 2         | 0.90    |
| <i>Escherichia coli</i>                 | 48        | 21.3    |
| <i>Salmonella</i>                       | 3         | 1.30    |
| <i>Shigella</i>                         | 15        | 6.70    |
| <i>Klebsiella species</i>               | 52        | 23.1    |
| <i>Proteus species</i>                  | 33        | 14.7    |
| <b>Total bacteria isolated</b>          | 224       |         |

265  
266  
267  
268  
269  
270  
271  
272  
273  
274  
275  
276  
277

### 278 **3.2.1. Risk factors of bacteria**

279 In the present study, different relevant factors were assessed for possible association with  
280 bacterial isolation rate from hand swabs among the respondents (**Table 3**).

281 The number of positive bacterial cultures from hand swabs was higher among the age group of  
282 25-30 years (73.5%) and 18-24 years (73.1%) than their counterparts ( $P=.171$ ). Similarly, the  
283 frequency of isolation rate of bacteria from hand swabs of housemaids was higher among those  
284 who cannot read and write (85.7%) than those housemaids who attended primary school (74.6%)  
285 and secondary school and above (68%) ( $P=.399$ ) (**Table 3**).

286 The frequency of isolation rate of bacteria from hand swabs of housemaids was higher among  
287 housemaids who didn't wash their hands frequently (88.9%) than their counterparts ( $P=.096$ ). In  
288 addition, the frequency of the isolation rate of bacteria from hand swabs was higher among  
289 housemaids who wash hands frequently with soap/other detergents (70.9%) than those  
290 housemaids who didn't wash their hands frequently with soap/other detergents (40.0%)  
291 ( $P=.137$ ). Furthermore, the isolation rate of bacteria from swabs was higher among housemaids  
292 who didn't follow five steps to wash their hands the right way (73.5%) ( $P=.190$ ) and remove  
293 watch, ring, and bracelet during hand washing (75.3%) ( $P=.019$ ) than their counterparts (**Table**  
294 **3**).

295 The expected risk factors on socio-demographic factors such as age and educational status, and  
296 housemaids' hand hygiene practices such as fingernail status, frequent handwashing, how to  
297 wash hands, use of soap and water for frequent hand washing, following five steps to wash hands  
298 in the right way and time in second to wash hands weren't found to be significantly associated  
299 with a bacteria isolation rate of hand swabs. However, removing a watch, ring, and bracelet  
300 during hand washing was found to be statistically associated ( $P= P=.019$ ) (**Table 3**).

301  
302  
303  
304  
305  
306  
307  
308

309 **Table 3: Risks factors related to the presence of bacterial isolation from hand swabs of**  
 310 **housemaids (n=225) engaged in communal living residences in Jimma City, Southwest**  
 311 **Ethiopia, 2022.**

| Variables                                                | Category            | The bacterial culture results from hand swabs |                | Association                          |
|----------------------------------------------------------|---------------------|-----------------------------------------------|----------------|--------------------------------------|
|                                                          |                     | Negative n (%)                                | Positive n (%) |                                      |
| Age                                                      | 18-24 years         | 49(26.9)                                      | 133(73.1)      | $\chi^2_{(df=2)}= 3.534$<br>$P=.171$ |
|                                                          | 25-30 Years         | 9(26.5)                                       | 25(73.5)       |                                      |
|                                                          | ≥31 Years           | 5(55.6)                                       | 4(44.4)        |                                      |
| Educational status                                       | Cannot read & write | 1(14.3)                                       | 6(85.7)        | $\chi^2_{(df=2)}=1.835$<br>$P=.399$  |
|                                                          | Primary school      | 30(25.4)                                      | 88(74.6)       |                                      |
|                                                          | Secondary & above   | 32(32.0)                                      | 68(68)         |                                      |
| Fingernail status                                        | Not trimmed         | 10(20.4)                                      | 39(79.6)       | $\chi^2_{(df=1)}= 1.791$<br>$P=.181$ |
|                                                          | Trimmed             | 53(30.1)                                      | 123(69.9)      |                                      |
| Wash hands frequently                                    | No                  | 2(11.1)                                       | 16(88.9)       | $\chi^2_{(df=1)}= 2.768$<br>$P=.096$ |
|                                                          | Yes                 | 61(29.5)                                      | 146(70.5)      |                                      |
| How to wash your hands?                                  | Only with water     | 8(26.7)                                       | 22(73.3)       | $\chi^2_{(df=1)}= .133$<br>$P=.716$  |
|                                                          | Water with soap     | 53(29.9)                                      | 124(70.1)      |                                      |
| Wash hands frequently with soap/other detergents         | No                  | 3(60.0)                                       | 2(40.0)        | $\chi^2_{(df=1)}= 2.216$<br>$P=.137$ |
|                                                          | Yes                 | 50(29.1)                                      | 122(70.9)      |                                      |
| Follow five steps to wash hands the right way            | No                  | 36(26.5)                                      | 100(73.5)      | $\chi^2_{(df=1)}= 1.715$<br>$P=.190$ |
|                                                          | Yes                 | 25(35.2)                                      | 46(64.8)       |                                      |
| Remove the watch, ring, and bracelet during hand washing | No                  | 36(24.7)                                      | 110(75.3)      | $\chi^2_{(df=1)}= 5.517$<br>$P=.019$ |
|                                                          | Yes                 | 25(41.0)                                      | 36(59.0)       |                                      |
| Wash hands for 20 seconds                                | No                  | 25(23.8)                                      | 80(76.2)       | $\chi^2_{(df=1)}= 3.283$<br>$P=.070$ |
|                                                          | Yes                 | 36(35.3)                                      | 66(64.7)       |                                      |

312  
 313  
 314  
 315  
 316  
 317  
 318  
 319  
 320  
 321

### 322 **3.3. Antimicrobial susceptibility pattern of bacterial isolates**

323 The majority, 70(98.6%) of *Staphylococcus aureus* were sensitive to Chloramphenicol followed  
324 by 51(71.8%) and 46(64.8%) sensitive to Vancomycin and Gentamycin respectively. *Coagulase-*  
325 *Negative Staphylococci* were sensitive to all drugs except a single isolate of *Coagulase-Negative*  
326 *Staphylococci* resistant to Ceftriaxone (**Table 4**).

327 More than  $\frac{2}{3}$ , 36(75%), 38(79.2%), 42(87.5%), and 37(77.1%) of *Escherichia coli* were sensitive  
328 to Tetracycline, Vancomycin, Ceftriaxone, Chloramphenicol, and Ceftazidime respectively,  
329 while no resistance was recorded on Gentamycin with only 18(37.5%) of *Escherichia coli*, were  
330 intermediates (**Table 4**).

331 Thirty-three (100%) and 46(88.5%) of *Proteus species* and *Klebsiella species* were sensitive to  
332 Chloramphenicol whereas 16(48.5%) and 24(46.2%) of *Proteus species* and *Klebsiella*  
333 *species* were resistant to Ceftriaxone and Vancomycin respectively. Despite three *Salmonella*  
334 and 12(80.0%) of *Shigella* being sensitive to Chloramphenicol, two *Salmonella* and 15(100%)  
335 of *Shigella* were resistant to Vancomycin respectively (**Table 4**).

336 Antimicrobial susceptibility patterns of different bacteria isolated from swab samples of  
337 housemaids working in communal living residences in Jimma City are presented in (**Table 4**).

338

339

340

341

342

343

344

345

346

347

348

349

350

351

352 **Table 4: Antimicrobial susceptibility pattern of bacteria isolated from hand swabs of**  
 353 **housemaids working in communal living residences in Jimma City, Southwest Ethiopia,**  
 354 **2022.**

| <b>Bacterial isolate</b>  | <b>Total</b> | <b>SP</b> | <b>TE[n(%)]</b> | <b>CRO [n(%)]</b> | <b>C[n(%)]</b> | <b>GEN[n(%)]</b> | <b>VA[n(%)]</b> | <b>CAZ[n(%)]</b> |
|---------------------------|--------------|-----------|-----------------|-------------------|----------------|------------------|-----------------|------------------|
| <i>S.aureus</i>           | 71           | S         | 42[59.2]        | 45[63.4]          | 70[98.6]       | 46[64.8]         | 51[71.8]        | 30[42.3]         |
|                           |              | I         | 9[12.7]         | 4[5.6]            | 1[1.4]         | 25[35.2]         | 1[1.4]          | 25[35.2]         |
|                           |              | R         | 20[28.2]        | 22[31.0]          | 0[0.00]        | 0[0.00]          | 19[26.8]        | 16[22.5]         |
| <i>CNS</i>                | 2            | S         | 2               | 0                 | 2              | 2                | 2               | 2                |
|                           |              | I         | 0               | 1                 | 0              | 0                | 0               | 0                |
|                           |              | R         | 0               | 1                 | 0              | 0                | 0               | 0                |
| <i>E.coli</i>             | 48           | S         | 36[75.0]        | 38[79.2]          | 42[87.5]       | 30[62.5]         | 36[75.0]        | 37[77.1]         |
|                           |              | I         | 0[0.00]         | 4[8.30]           | 0[0.00]        | 18[37.5]         | 0[0.00]         | 5[10.4]          |
|                           |              | R         | 12[25.0]        | 6[12.5]           | 6[12.5]        | 0[0.00]          | 12[25.0]        | 6[12.5]          |
| <i>Salmonella</i>         | 3            | S         | 1               | 2                 | 3              | 1                | 1               | 2                |
|                           |              | I         | 1               | 0                 | 0              | 1                | 0               | 1                |
|                           |              | R         | 1               | 1                 | 0              | 1                | 2               | 0                |
| <i>Shigella</i>           | 15           | S         | 3[20.0]         | 8[53.3]           | 12[80.0]       | 12[80.0]         | 0[0.00]         | 8[53.3]          |
|                           |              | I         | 5[33.3]         | 3[20.0]           | 3[20.0]        | 0[0.00]          | 0[0.00]         | 3[20.0]          |
|                           |              | R         | 7[46.7]         | 4[26.7]           | 0[0.00]        | 3[20.0]          | 15[100.0]       | 4[26.7]          |
| <i>Klebsiella species</i> | 52           | S         | 25[48.1]        | 28[53.8]          | 46[88.5]       | 31[59.6]         | 5[9.6]          | 28[53.8]         |
|                           |              | I         | 15[28.8]        | 14[26.9]          | 6[11.5]        | 21[40.4]         | 23[44.2]        | 7[13.5]          |
|                           |              | R         | 12[23.1]        | 10[19.2]          | 0[0.00]        | 0[0.00]          | 24[46.2]        | 17[32.7]         |
| <i>Proteus species</i>    | 33           | S         | 23[69.7]        | 9[27.3]           | 33[100.0]      | 27[81.8]         | 16[48.5]        | 5[15.2]          |
|                           |              | I         | 1[3.0]          | 8[24.2]           | 0[0.00]        | 5[15.2]          | 7[21.2]         | 20[60.6]         |
|                           |              | R         | 9[27.3]         | 16[48.5]          | 0[0.00]        | 1[3.0]           | 10[30.3]        | 8[24.2]          |

355 **CNS:** Coagulase-Negative Staphylococci, **SP:** Sensitivity pattern; **S:** Sensitivity; **I:** Intermediate;  
 356 **R:** Resistant; **TE:** Tetracycline; **CRO:** Ceftriaxone; **C:** Chloramphenicol; **GEN:** Gentamycin;  
 357 **VA:** Vancomycin; **CAZ:** Ceftazidime; **n:** Number

358  
 359  
 360  
 361  
 362  
 363  
 364

## 365 4. Discussion

366 Housemaids with poor hand hygiene could be potential sources of infection due to pathogenic  
367 bacteria which can cause food contamination, and consequently food-borne diseases that pose a  
368 potential risk to public health [22,31]. Due to the scarcity of published information, bacterial  
369 contamination level among housemaids in Ethiopia is underexplored. Therefore, the present  
370 study was undertaken to assess the profiles of bacteria isolates and associated factors as well as  
371 their antimicrobial resistance pattern among housemaids working in communal living residences  
372 in Jimma City, Ethiopia.

373 Among 225 respondents who participated in this study, one or more bacterial pathogens were  
374 isolated from 162 study subjects with a prevalence of 72% (95%CI: 66.2-77.8%). This result is  
375 nearly coherent with the results reported across the globe: Sari city, north of Iran (62.2%) [31],  
376 Tripoli, Libya (71.41%) [32], Alexandria, Egypt (60%) [33], Mauritius (91.0%) [12] and  
377 Ethiopia (49.6%,70.1%,55.7% & 83.9%) [8–10,34]. On the other hand, the result is higher than  
378 the results reported in Eastern India (37.9%) [5], Sudan (23.2%) [7], and Ethiopia (29.5%) [14].  
379 The isolation of bacteria from hand swabs could be due to improper handwashing practices such  
380 as not removing watches, rings, and bracelets during handwashing. Evidence from a study  
381 indicated that jewelry like a watch, rings, and bracelets would lead to bacterial colonization  
382 underneath unless removed and rinsed thoroughly during handwashing [35]. In addition,  
383 isolation of bacteria illustrates the concept of fecal contamination due to poor hand hygiene [36].  
384 On other the hand reason would be likely because of handwashing water quality. Evidences  
385 revealed that the bacterial contamination of hands significantly affected by handwashing water  
386 [37,38].

387 The following bacteria pathogens were isolated *Staphylococcus aureus*, *Coagulase-Negative*  
388 *Staphylococci*, *Escherichia coli*, *Salmonella*, *Shigella*, *Klebsiella species*, and *Proteus species*.  
389 *Staphylococcus aureus* (31.8%) was the predominant bacterial species isolated from hand swabs  
390 of housemaids followed by *Klebsiella species* (23.3%) and *E.coli* (21.5%) respectively. This  
391 result coincided with the results reported in previous studies [7,8,10,14,31,32,34,39]. The  
392 isolation of *Staphylococcus aureus* could be because it is pathogenic bacteria that are normal  
393 flora of the skin and other body parts whereas the isolation of *E.coli*, *Salmonella*, *Shigella*,  
394 *Klebsiella species*, and *Proteus species* illustrates the concept of fecal contamination due to poor  
395 hand hygiene practices. De Alwis and colleagues revealed that contaminated surfaces such as

396 toilets and washrooms could be the sources of contamination of the hands when a person comes  
397 into contact [36]. In addition, the microbial contamination of hands could be due to the  
398 ineffectiveness of handwashing agents [40]. Moreover, ignorance of handwashing with soap,  
399 touching dirty materials, and long fingernails [12,41]. Therefore, the detection of bacteria  
400 isolated from the hand of housemaids might pose potential outbreaks for the immediate servant  
401 or the community as a whole [9]. Due to this, it's a public health problem of major concern [42].  
402 The majority of *Staphylococcus aureus* (98.6%) was sensitive to Chloramphenicol followed by  
403 71.8% and 64.8% to Vancomycin and Gentamycin respectively. This result is lower than the  
404 result reported at the University of Gondar Referral Hospital, Ethiopia (76.9%, 100%, and 82.1%  
405 were sensitive to Chloramphenicol, Vancomycin, and Gentamycin) [10].  
406 In this study more than two-thirds, 75%, 79.2%, 87.5%, and 77.1% of *Escherichia coli* were  
407 sensitive to Tetracycline, Vancomycin, Ceftriaxone, Chloramphenicol, and Ceftazidime. In  
408 addition, nearly 100% and 88.5% of *Proteus species* and *Klebsiella species* were sensitive to  
409 Chloramphenicol. This result is higher than the results reported in the University of Gondar  
410 Cafeteria, University of Gondar Referral Hospital, and Debre Markos, Ethiopia [9,10,14].  
411 Despite three *Salmonella* and 80.0% of *Shigella* being sensitive to Chloramphenicol, two  
412 *Salmonella* and 100% of *Shigella* were resistant to Vancomycin. This result is higher than the  
413 result reported in the University of Gondar Cafeteria [9]. In addition, single *Salmonella* and  
414 46.7% of *Shigella* were resistant to Tetracycline. This result is lower than the result reported at  
415 Debre Markos University catering establishments [22].  
416 Even though a high rate of bacteria's isolate sensitivity to Chloramphenicol in the present study,  
417 a high frequency of drugs resistance to Tetracycline, Vancomycin, Gentamycin, and Ceftriaxone  
418 was observed for *Staphylococcus aureus*, *Coagulase-Negative Staphylococci*, *Escherichia coli*,  
419 *Salmonella*, *Shigella*, *Klebsiella species*, and *Proteus species*. Nowadays, antimicrobial  
420 resistance is an emerging global challenge that results in the spread of infectious diseases that  
421 affect human populations [21,23]. Those drug-resistant microbes can multiply, carry on and  
422 produce harm because of a complex set of causes: biological processes, human behaviors, and  
423 other social factors [20]. The resistance to drugs could be because they developed mechanisms  
424 (evolutionary processes) or be natural phenomena that microbe tends to adapt it [19,20]. Another  
425 reason could be the inappropriate use of drugs by the community, the use of antibiotics in



426 animals, and the external environment [21–23]. In addition, a global connection of a large human  
427 population allows microbes into the environment to which all of humanity has access to it [23].  
428 In advance, there are many infection control strategies to cope with the results from pathogenic  
429 bacteria and their AMR at an individual level as well as at the community level suggested by  
430 many scientific communities. Thus, classic communicable disease control methods particularly  
431 hand-hygiene remain the cornerstone to curb such public health issues [43]. Proper handwashing  
432 minimizes the expansion of fecal-oral pathogenic microbes from hands and other sources of the  
433 environment [44]. Moreover, to prevent and control antimicrobial drug-resistant microbes,  
434 washing hands regularly and an improvement in hand hygiene are up to date [45]. Therefore,  
435 practicing good hand hygiene can reduce outbreaks of pathogen transmission and minimize the  
436 spread of antibiotic resistance micro-organisms [46].

437  
438  
439  
440  
441  
442  
443  
444  
445  
446  
447  
448  
449  
450  
451  
452  
453  
454  
455  
456

## 457 **5. Conclusions**

458 This study revealed that 72% of housemaids engaged in dwellings tested positive for one or more  
459 than one bacterial contaminant of the hands. The following bacterial pathogens were identified  
460 from hand swabs of study subjects: *Staphylococcus aureus*, *Coagulase-Negative Staphylococci*,  
461 *Escherichia coli*, *Salmonella*, *Shigella*, *Klebsiella species*, and *Proteus species*. Thus, the hands  
462 of housemaids could be very important potential sources of disease-causing bacterial pathogens  
463 that would result in the potential risk of foodborne diseases. The presence of bacterial pathogens  
464 from hand swabs was significantly associated with removing a watch, ring, and bracelet during  
465 hand washing. Moreover, most of the isolated bacteria were sensitive to Chloramphenicol while  
466 the majority of them were resistant to Tetracycline, Gentamycin, Vancomycin, and Ceftazidime.  
467 In advance, there are many infection control strategies to cope with the results from such  
468 pathogenic bacteria at an individual level as well as at the community level. In resource-limited  
469 settings, regular handwashing and improvement in the hand-hygiene are up to date to prevent  
470 and control antimicrobial-resistant microbes. Therefore, housemaids should practice proper hand  
471 hygiene to reduce/remove pathogenic bacteria, and minimize the spread of antibiotic-resistant  
472 micro-organisms. In addition, any community health worker, regional, national, and stakeholders  
473 who are engaged in community health should create awareness about regular handwashing and  
474 its relevance in the prevention and reduction of pathogenic micro-organisms from hands in the  
475 wider community.

476

477

478

479

480

481

482

483

484

485

486

487

## 488 **Acknowledgment**

489 We would like to thank the study participants for being part of the study. In addition, we also  
490 gratefully acknowledge the households of study participants, Jimma city municipality, and  
491 Jimma University community service directives for their collaboration. Our heartfelt thanks go to  
492 data collectors Mr. Dawit Abera, Mr. Bizuwerk Sharew, and Mr. Soressa Gershe. Finally, we are  
493 joyful to thank Jimma University, Institute of Health for financial support for the completion of  
494 the study.

## 495 **Lists of Abbreviations**

496 **AMR**: Antimicrobial Resistance, **EMB**: Eosin Methylene Blue, **IRB**: Institutional Review  
497 Board, **KIA**: Kligler Iron Agar, **MSA**: Mannitol Salt Agar, **NCCLS**: National Committee for  
498 Clinical Laboratory Standards, **SCA**: Simon Citrate Agar, **SIM**: Sulfide Indole Motility, **SOP**:  
499 Standard Operating Procedure, **SPSS**: Statistical Package for Social Science, **SSA**: Salmonella-  
500 Shigella Agar, **PPE**: Personal protective equipment

## 501 **Author contributions**

502 **Conceptualization**: Tadele Shiwito Ango

503 **Data curation**: Tadele Shiwito Ango

504 **Formal analysis**: Tadele Shiwito Ango

505 **Investigation**: Tadele Shiwito Ango

506 **Methodology**: Tadele Shiwito Ango

507 **Software**: Tadele Shiwito Ango

508 **Visualization**: Tadele Shiwito Ango, Tizita Teshome, Tesfalem Getahun, Girma Mamo,  
509 Negalign Biyadgie

510 **Writing-original draft**: Tadele Shiwito Ango, Girma Mamo, Negalign Biyadgie

511 **Writing, reviewing & editing**: Tadele Shiwito Ango, Tizita Teshome, Tesfalem Getahun,  
512 Girma Mamo, Negalign Biyadgie

513

514

515

## 516 **References**

- 517 [1] Getie M, Abebe W, Tessema B. Prevalence of enteric bacteria and their antimicrobial  
518 susceptibility patterns among food handlers in Gondar town, Northwest Ethiopia.  
519 Antimicrob Resist Infect Control 2019;11:1–6. [https://doi.org/10.1186/s13756-019-0566-](https://doi.org/10.1186/s13756-019-0566-7)  
520 [7](https://doi.org/10.1186/s13756-019-0566-7).
- 521 [2] Grace D. Food Safety in Low and Middle-Income Countries. Int J Environ Res Public  
522 Heal 2015;12:10490–507. <https://doi.org/10.3390/ijerph120910490>.
- 523 [3] Grace D. Food safety in developing countries: An overview. A learning resource for  
524 Department for International Development (DFID) Livelihoods Advisers. Crown 2015.  
525 [https://doi.org/10.12774/eod\\_er.oct2015.graced](https://doi.org/10.12774/eod_er.oct2015.graced).
- 526 [4] WHO. Food safety 30. [https://www.who.int/en/news-room/fact-sheets/detail/food-](https://www.who.int/en/news-room/fact-sheets/detail/food-safety)  
527 [Safety](https://www.who.int/en/news-room/fact-sheets/detail/food-safety) 2020:1–9.
- 528 [5] Banik S, Chakrabarty S, Das N. Hand hygiene in food handlers working in canteens of an  
529 educational institution in Eastern India. Int J Community Med Public Heal 2020;7:2602–  
530 6. <https://doi.org/10.18203/2394-6040.ijcmph20202983>.
- 531 [6] Kalekidan T, Behailu K, Rediet H. The Ethiopian perception on food safety system. Adv  
532 Food Sci Technol 2014;2:260–8.
- 533 [7] Ahmed H, Hassan H. Bacteriological and Parasitological Assessment of Food Handlers in  
534 the Omdurman area of Sudan. J Microbiol Immunol Infect 2010;43:70–3.  
535 [https://doi.org/10.1016/S1684-1182\(10\)60010-2](https://doi.org/10.1016/S1684-1182(10)60010-2).
- 536 [8] Assefa T, Tasew H, Wondafrash B, Beker J. Contamination of Bacteria and Associated  
537 Factors among Food Handlers Working in the Student Cafeterias of Jimma University-  
538 Main Campus, Jimma, South West Ethiopia. Altern Integr Med 2015;4:185.  
539 <https://doi.org/10.4172/2327-5162.1000185>.
- 540 [9] Dagne M, Tiruneh M, Moges F, Gizachew M. Bacterial Profile and Antimicrobial  
541 Susceptibility Pattern among Food Handlers at Gondar University Cafeteria, Northwest  
542 Ethiopia. J Infect Dis Ther 2013;01:2–7. <https://doi.org/10.4172/2332-0877.1000105>.
- 543 [10] Mohammed A, Seid ME, Gebrecherkos T, Tiruneh M, Moges F. Bacterial Isolates and  
544 Their Antimicrobial Susceptibility Patterns of Wound Infections among Inpatients and  
545 Outpatients Attending the University of Gondar Referral Hospital, Northwest Ethiopia. Int  
546 J Microbiol 2017;2017. <https://doi.org/10.1155/2017/8953829>.

- 547 [11] Nasrolahei M, Mirshafiee S, Kholdi S, Salehian M, Nasrolahei M. Bacterial assessment of  
548 food handlers in Sari City, Mazandaran Province, north of Iran. *J Infect Public Health*  
549 2016;10:1–6. <https://doi.org/10.1016/j.jiph.2016.03.006>.
- 550 [12] Padaruth SK, Biranjia-Hurdoyal SD. Hygiene practices and fecal contamination of the  
551 hands of children attending primary school in Mauritius. *Int Health* 2015;7:280–4.  
552 <https://doi.org/10.1093/inthealth/ihu080>.
- 553 [13] Pickering AJ, Boehm AB, Mwanjali M, Davis J. Efficacy of waterless hand hygiene  
554 compared with handwashing with soap: A field study in Dar es Salaam, Tanzania. *Am J*  
555 *Trop Med Hyg* 2010;82:270–8. <https://doi.org/10.4269/ajtmh.2010.09-0220>.
- 556 [14] Mengist A, Aschale Y, Reta A. Bacterial and Parasitic Assessment from Fingernails in  
557 Debre Markos, Northwest Ethiopia. *Can J Infect Dis Med Microbiol* 2018;2018:1–7.  
558 <https://doi.org/10.1155/2018/6532014>.
- 559 [15] Worku T, Jejaw A, Kannan S, Wondafrash B. Isolation and Antimicrobial Sensitivity  
560 Patterns of Enteric Bacterial Pathogens from Asymptomatic Food Handlers, Jimma,  
561 Ethiopia. *Am J Heal Res* 2015;3:399–406. <https://doi.org/10.11648/j.ajhr.20150306.24>.
- 562 [16] Adamus-Bialek W, Zajac E, Parniewski P, Kaca W. Comparison of antibiotic resistance  
563 patterns in collections of *Escherichia coli* and *Proteus mirabilis* uropathogenic strains. *Mol*  
564 *Biol Rep* 2013;40:3429–35. <https://doi.org/10.1007/s11033-012-2420-3>.
- 565 [17] Kamil TD, Jarjes SF. Isolation, Identification, and Antibiotics Susceptibility  
566 Determination of *Proteus* Species Obtained from Various Clinical Specimens in Erbil  
567 City. *Polytech J* 2019;9:86–92. <https://doi.org/10.25156/ptj.v9n2y2019.pp86-92>.
- 568 [18] Boucher HW, Talbot GH, Bradley JS, Edwards JE, Gilbert D, Rice LB, et al. Bad bugs, no  
569 drugs: No ESCAPE! An update from the Infectious Diseases Society of America. *Clin*  
570 *Infect Dis* 2009;48:1–12. <https://doi.org/10.1086/595011>.
- 571 [19] Giubilini A, Savulescu J. Moral Responsibility and the Justification of Policies to Preserve  
572 Antimicrobial Effectiveness, 2020, p. 141–54. [https://doi.org/10.1007/978-3-030-27874-8\\_9](https://doi.org/10.1007/978-3-030-27874-8_9).
- 573
- 574 [20] Littmann J, Viens AM, Silva DS. Ethics and Drug Resistance: Collective Responsibility  
575 for Global Public Health. Gewerbestrasse 11, 6330 Cham, Switzerland: Springer; 2020.  
576 [https://doi.org/10.1007/978-3-030-27874-8\\_26](https://doi.org/10.1007/978-3-030-27874-8_26).
- 577 [21] Nijsingh N, Larsson DGJ, de Fine Licht K, Munthe C. Justifying Antibiotic Resistance

- 578 Interventions: Uncertainty, Precaution and Ethics, 2020, p. 357–75.  
579 [https://doi.org/10.1007/978-3-030-27874-8\\_22](https://doi.org/10.1007/978-3-030-27874-8_22).
- 580 [22] Mengist A, Mengistu G, Reta A. Prevalence and antimicrobial susceptibility pattern of  
581 Salmonella and Shigella among food handlers in catering establishments at Debre Markos  
582 University, Northwest Ethiopia. *Int J Infect Dis* 2018;75:74–9.  
583 <https://doi.org/10.1016/j.ijid.2018.08.008>.
- 584 [23] Michael CA, Dominey-Howes D, Labbate M. The antimicrobial resistance crisis: causes,  
585 consequences, and management. *Front Public Heal* 2014;2:1–8.  
586 <https://doi.org/10.3389/fpubh.2014.00145>.
- 587 [24] Okeke IN, Laxminarayan R, Bhutta ZA, Duse AG, Jenkins P, Brien TFO, et al.  
588 Antimicrobial resistance in developing countries. Part I : recent trends and current status.  
589 *Lancet Infect Dis* 2005;5:481–93.
- 590 [25] Woodward DL, Rodgers FG. Surveillance of antimicrobial resistance in salmonella,  
591 shigella and Vibrio cholerae in Latin America and the Caribbean: A collaborative project.  
592 *Can J Infect Dis Med Microbiol* 2000;11:181–6.
- 593 [26] Tadesse T, Deneke Y, Deresa B. Seroprevalence of bovine viral diarrhea virus and its  
594 potential risk factors in dairy cattle of Jimma town, southwestern Ethiopia. *J Dairy, Vet  
595 Anim Res* 2019;8:11–7. <https://doi.org/10.15406/jdvar.2019.08.00235>.
- 596 [27] Bargellini A, Ferranti G, Santangelo M, Venturelli F. Hand Hygiene Knowledge, Hand  
597 Contamination and Practice of Italian Nursing and Medical Students. *Epidemiol Biostat  
598 Public Heal* 2014;11:e9971. <https://doi.org/10.2427/9971>.
- 599 [28] American Type Culture Collection. Introduction to microbiology. Manassas, Virginia  
600 20110-2209: 2022.
- 601 [29] Cheesbrough M. District Laboratory in Tropical Practice Countries: Part 2. 2 edition.  
602 Cambridge CB2 8RU, UK: Cambridge University Press; 2006.
- 603 [30] CLSI. Performance Standards for Antimicrobial Susceptibility. vol. 40. 30th ed. CLSI  
604 Supplement M100. Wayne, PA: Clinical and Laboratory Standards Institute; 2020.
- 605 [31] Nasrolahei M, Mirshafiee S, Kholdi S, Salehian M, Nasrolahei M. Bacterial assessment of  
606 food handlers in Sari City, Mazandaran Province, north of Iran. *J Infect Public Health*  
607 2017;10:171–6. <https://doi.org/10.1016/j.jiph.2016.03.006>.
- 608 [32] Alsagher MR, Soudah SA, Khsheba AE, Fadel SM, Dadiesh MA, Houme MA, et al. Hand

- 609 Washing Before and After Applying Different Hand Hygiene Techniques in Places of  
610 Public Concern in Tripoli-Libya. *Open Microbiol J* 2018;12:364–75.  
611 <https://doi.org/10.2174/1874285801812010364>.
- 612 [33] EL-Kady H. Efficacy of Different Alcohol-based Hand Disinfectants in Reduction of  
613 Hand Contamination among Food Handlers in Alexandria, Egypt. *JAMB* 2018;13:1–13.  
614 <https://doi.org/10.9734/JAMB/2018/45345>.
- 615 [34] Gashaw A, Afework K, Feleke M, Moges T, Kahsay H. Prevalence of bacteria and  
616 intestinal parasites among food-handlers in Gondar Town, Northwest Ethiopia. *J Health*  
617 *Popul Nutr* 2008;26:451–5.
- 618 [35] Kampf G, Löffler H. Hand disinfection in hospitals – benefits and risks. *JDDG*  
619 2010;2010:978–83. <https://doi.org/10.1111/j.1610-0387.2010.07501.x>.
- 620 [36] De Alwis WR, Pakirisamy P, Wai San L, Xiaofen EC. A Study on Hand Contamination  
621 and Hand Washing Practices among Medical Students. *ISRN Public Health* 2012;2012:1–  
622 5. <https://doi.org/10.5402/2012/251483>.
- 623 [37] Berhanu L, Mereta ST, Gume B, Kassa T, Berihun G, Dadi LS, et al. Effect of microbial  
624 quality of washing water on hand hygiene status of food handlers in Jimma town:  
625 Implication for food hygiene and safety. *J Multidiscip Healthc* 2021;14:1129–34.  
626 <https://doi.org/10.2147/JMDH.S306359>.
- 627 [38] Burton M, Cobb E, Donachie P, Judah G, Curtis V, Schmidt WP. The effect of  
628 handwashing with water or soap on bacterial contamination of hands. *Int J Environ Res*  
629 *Public Health* 2011;8:97–104. <https://doi.org/10.3390/ijerph8010097>.
- 630 [39] Ogba OM, Asukwo PE, Otu-Bassey IB. Assessment of bacterial carriage on the hands of  
631 primary school children in Calabar municipality, Nigeria. *Biomed Dermatology* 2018;2:1–  
632 7. <https://doi.org/10.1186/s41702-017-0017-0>.
- 633 [40] Gizaw Z, Yalew AW, Bitew BD, Lee J, Bisesi M. Effects of local handwashing agents on  
634 microbial contamination of the hands in a rural setting in Northwest Ethiopia: a cluster  
635 randomized controlled trial. *BMJ Open* 2022;12:e056411.  
636 <https://doi.org/10.1136/bmjopen-2021-056411>.
- 637 [41] Allam H, Al-Batanony M, Seif A, Awad E. Hand Contamination among Food Handlers.  
638 *BMRJ* 2016;13:1–8. <https://doi.org/10.9734/bmrj/2016/24845>.
- 639 [42] HEAT in Africa. Federal Democratic Republic of Ethiopia-Ministry of Health.

- 640 Communicable Diseases. Part 4: Other Diseases of Public Health Importance and  
641 Surveillance. Blended Learning Module for the Health Extension Programme. Addis  
642 Ababa: 2011.
- 643 [43] Bonten MJM. Controlling Transmission of Antibiotic-Resistant Bacteria in ICU Settings.  
644 Fourth Edi. Elsevier Ltd; 2017. <https://doi.org/10.1016/b978-0-7020-6285-8.00077-0>.
- 645 [44] USFDA. Employee Health and Personal Hygiene Handbook. 2020.
- 646 [45] World Health Organization. Antibiotic resistance. Prev Control 2020.  
647 <https://www.who.int/news-room/fact-sheets/detail/antibiotic-resistance>.
- 648 [46] Amegah KE, Addo HO, Ashinyo ME, Fiagbe L, Akpanya S, Akoriyea SK, et al.  
649 Determinants of Hand Hygiene Practice at Critical Times among Food Handlers in  
650 Educational Institutions of the Sagnarigu Municipality of Ghana: A Cross-Sectional  
651 Study. Environ Health Insights 2020;14:1–10.  
652 <https://doi.org/10.1177/1178630220960418>.
- 653



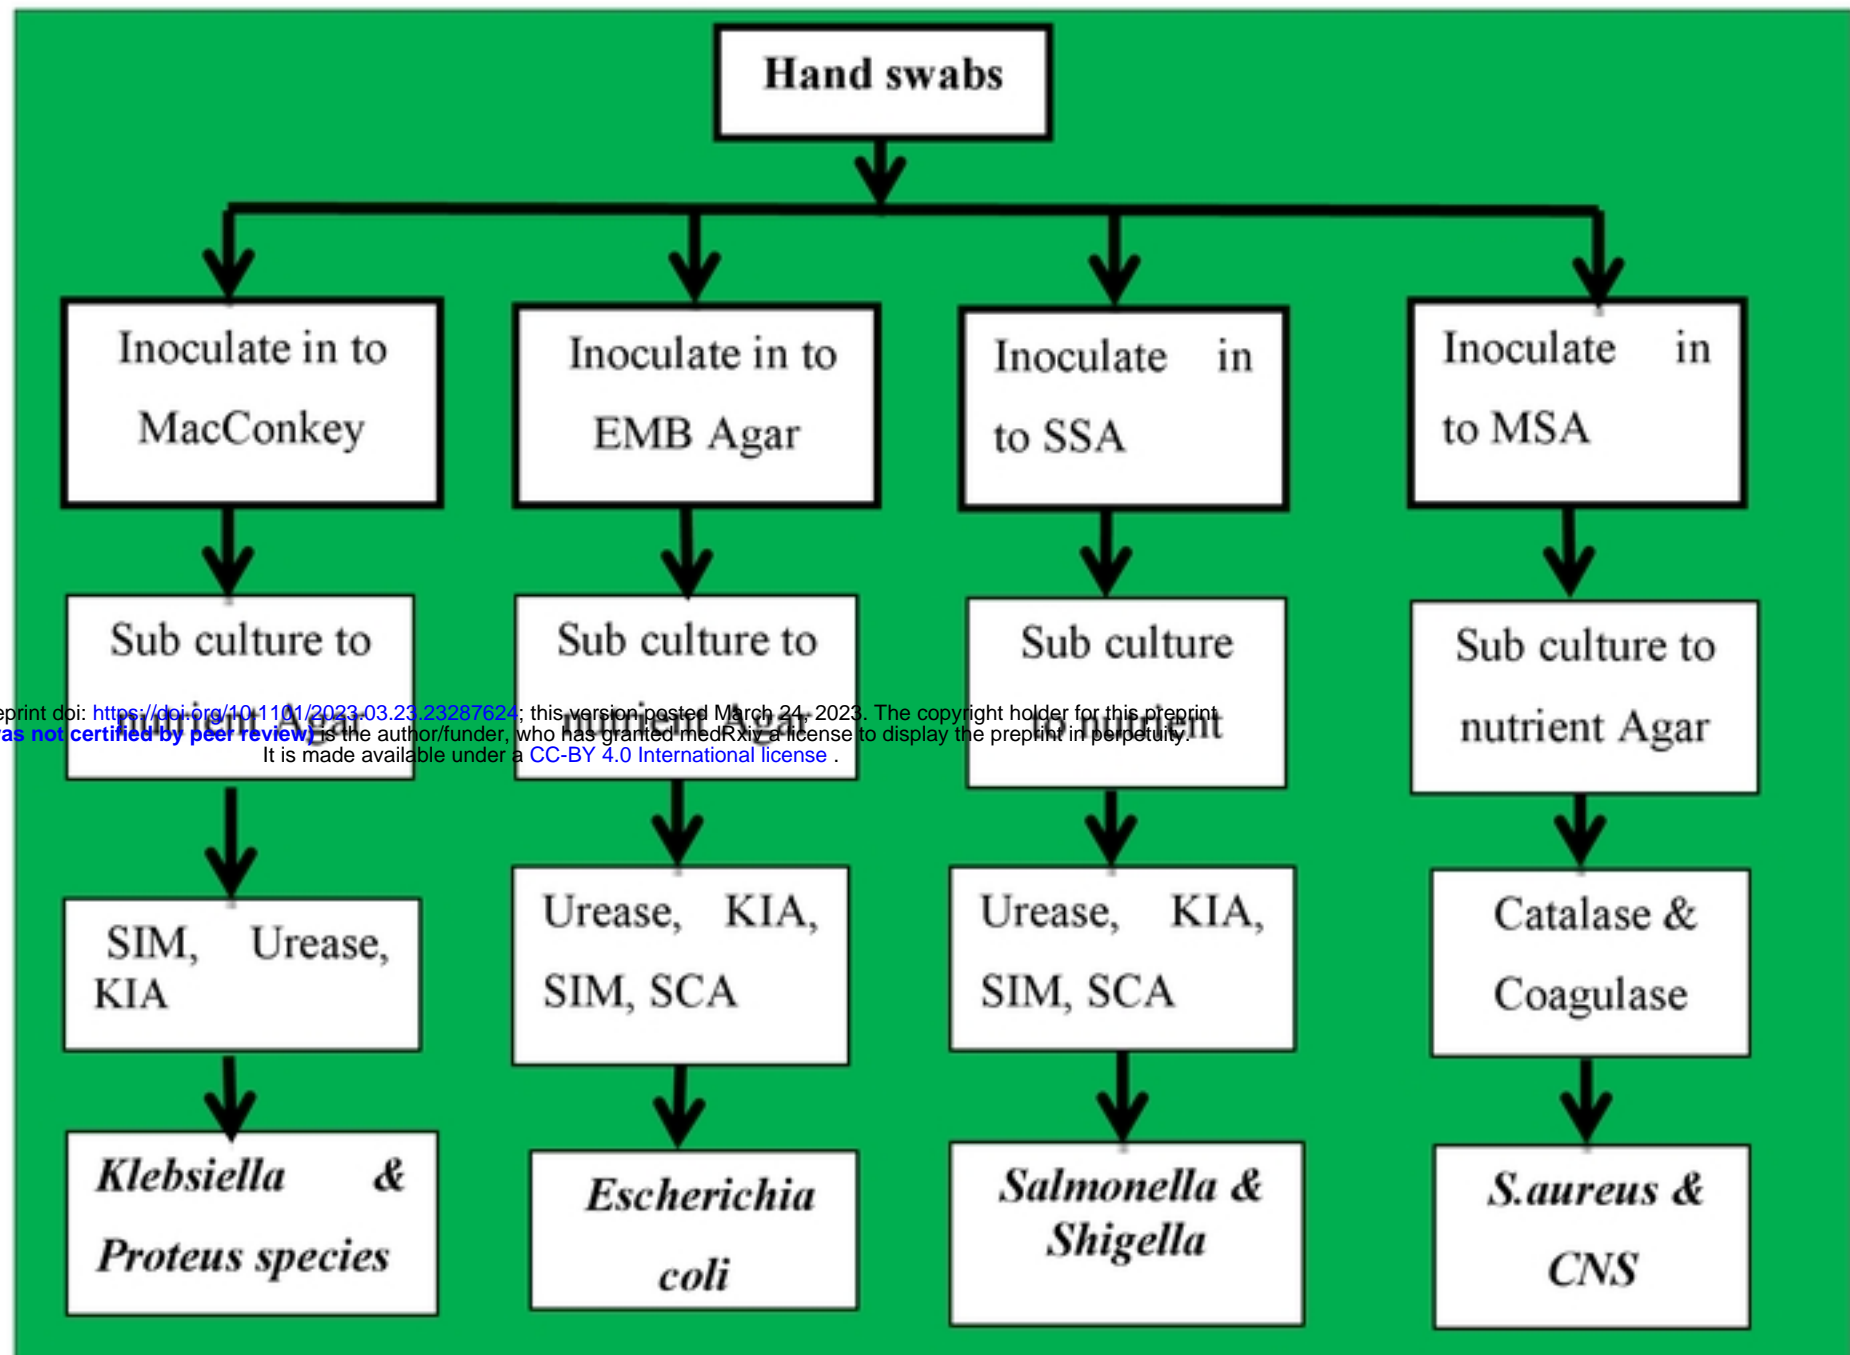

Figure 1: Laboratory flow chart showing bacterial isolations from hand swabs samples.

**Age category of study participants in frequency vs percent**

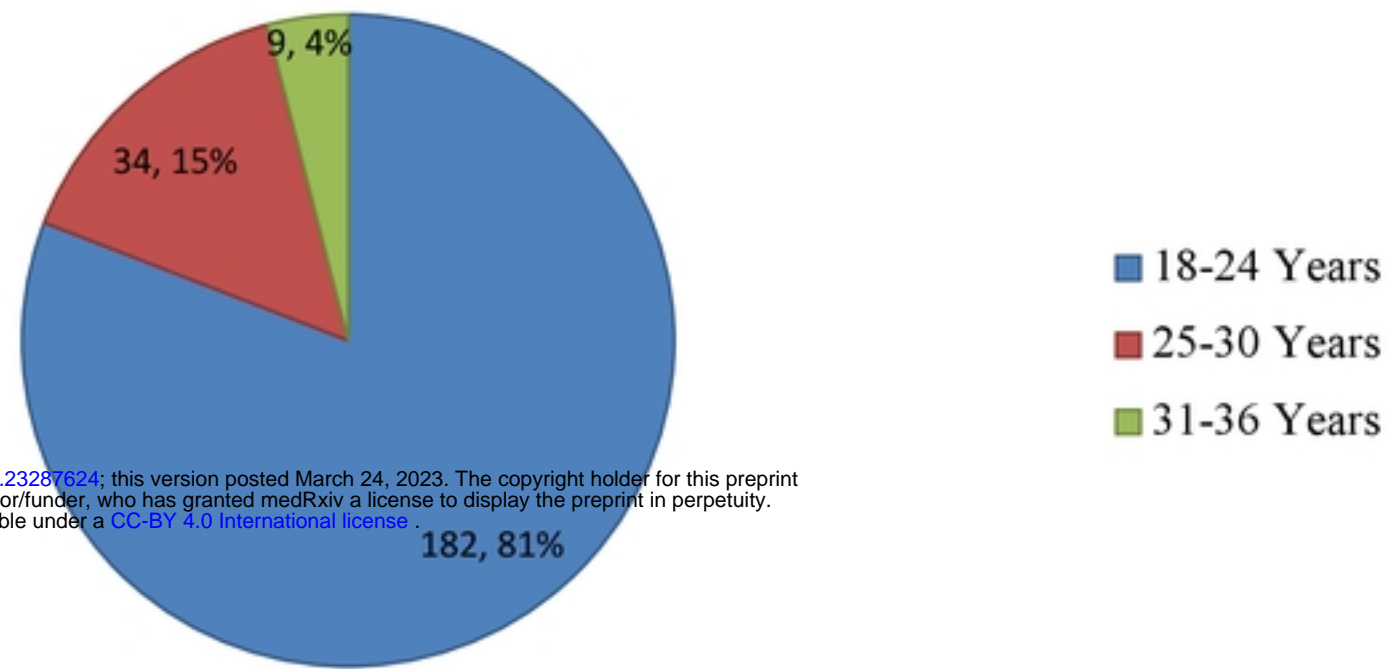

medRxiv preprint doi: <https://doi.org/10.1101/2023.03.23.23287624>; this version posted March 24, 2023. The copyright holder for this preprint (which was not certified by peer review) is the author/funder, who has granted medRxiv a license to display the preprint in perpetuity. It is made available under a [CC-BY 4.0 International license](https://creativecommons.org/licenses/by/4.0/).

**Figure 1: Pi chart showing the age category of housemaids (n=225) working in communal residences in Jimma City, Southwest Ethiopia, 2022.**

**Educational status of study participants in frequency vs percent**

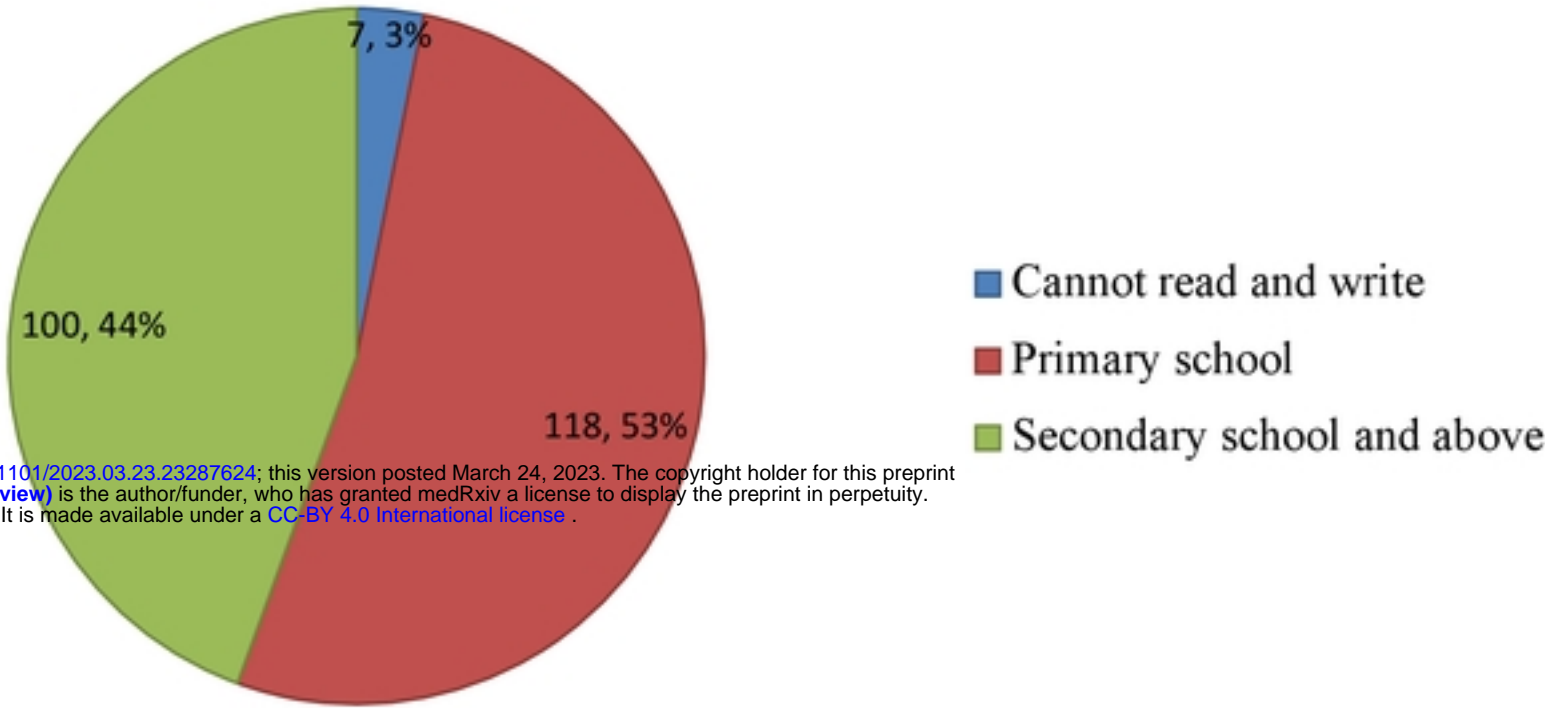

medRxiv preprint doi: <https://doi.org/10.1101/2023.03.23.23287624>; this version posted March 24, 2023. The copyright holder for this preprint (which was not certified by peer review) is the author/funder, who has granted medRxiv a license to display the preprint in perpetuity. It is made available under a [CC-BY 4.0 International license](https://creativecommons.org/licenses/by/4.0/).

**Figure 1: Pi chart showing the educational status of housemaids (n=225) working in communal residences in Jimma City, Southwest Ethiopia, 2022.**
